# Supplementary material for: A high-rate capability and energy density sodium ion full cell enabled by F-doped Na2Ti3O7 hollow spheres
Source: Royal Society of Chemistry journal article supplement (doi:10.1039/d2ta06143k), 2022-01-01
Supplement: d2ta06143k1.pdf [file d2ta06143k1.pdf]

## High-rate capability and energy density sodium ion full cell enabled by F-doped $\text{Na}_2\text{Ti}_3\text{O}_7$ hollow spheres

Du Pan<sup>a,b,d</sup>, Weixin Chen<sup>c</sup>, Shuwei Sun<sup>a,b</sup>, Xia Lu<sup>c</sup>, Xiaolei Wu<sup>a,b</sup>, Caiyan Yu<sup>a,b\*</sup>, Yong-Sheng Hu<sup>d\*</sup>, Ying Bai<sup>a,b\*</sup>

<sup>a</sup>International Joint Research Laboratory of New Energy Materials and Devices of Henan Province, School of Physics and Electronics, Henan University, Kaifeng, 475004, P. R. China.

<sup>b</sup>Academy for Advanced Interdisciplinary Studies Henan University, Kaifeng, 475004, P. R. China.

<sup>c</sup>School of Materials, Sun Yat-sen University, Guangzhou, 510006, P. R. China.

<sup>d</sup>Beijing National Laboratory for Condensed Matter Physics, Institute of Physics, Chinese Academy of Sciences, Beijing 100190, P. R. China.

E-mail: cyyu@henu.edu.cn (Caiyan Yu); yshu@iphy.ac.cn (Yong-Sheng Hu); ybai@henu.edu.cn (Ying Bai)

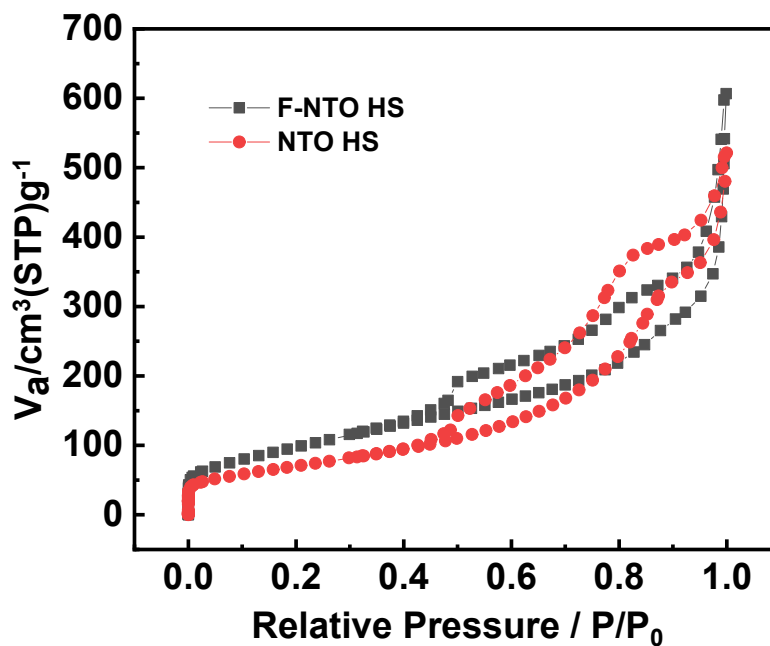

Fig. S1.  $\text{N}_2$  adsorption isotherms distributions of the NTO HS and F-NTO HS samples.

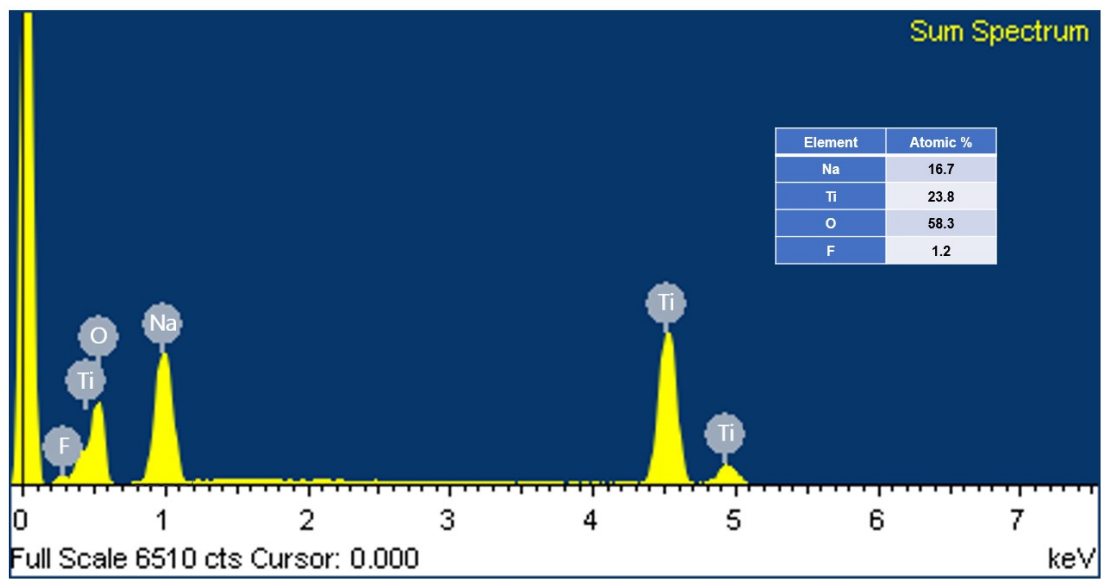

**Fig. S2.** EDS spectrum and corresponding element contents (inset) of F-NTO HS.

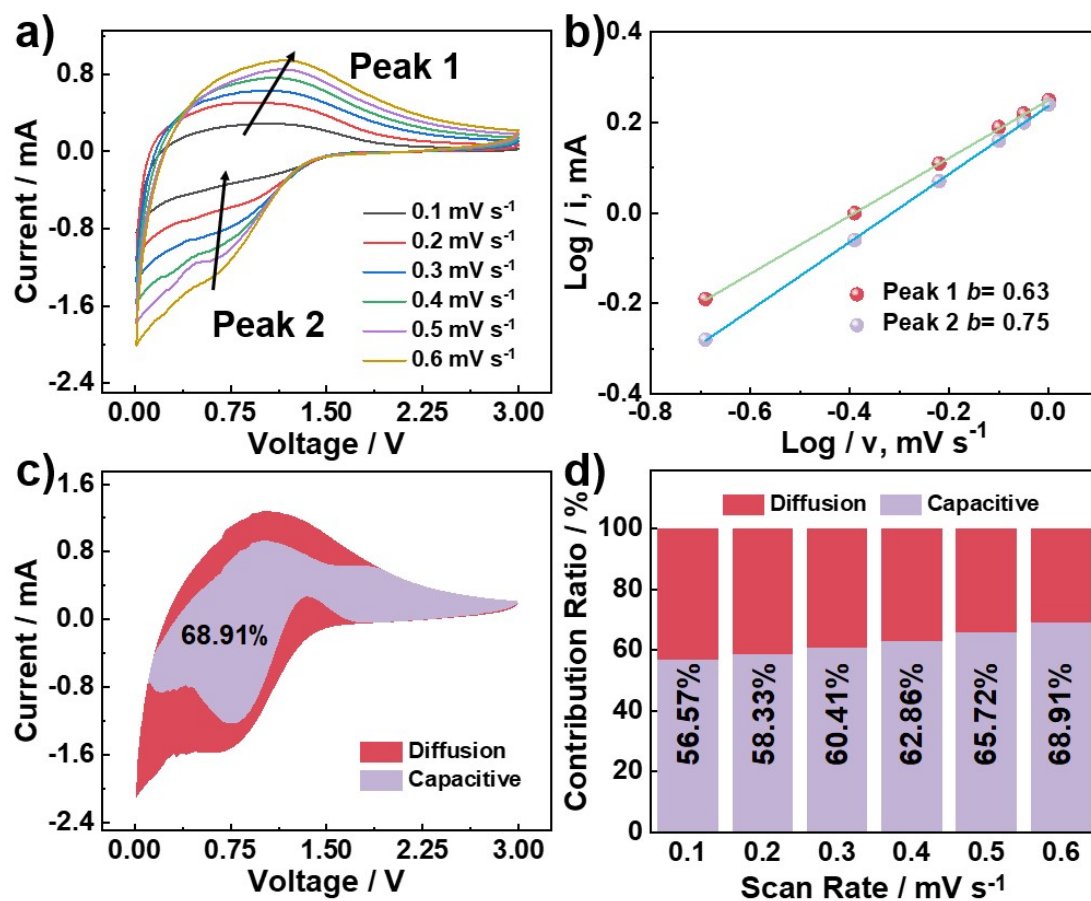

**Fig. S3.** CV curves collected under different scan rates (a). Regression relationship between log(scan rate) and log(peak current) (b). Capacitive and diffusion contributions of F-NTTO HS at 0.6 mV s<sup>-1</sup> (c). Normalized ratio of diffusion and capacitances under different scan rates (d).

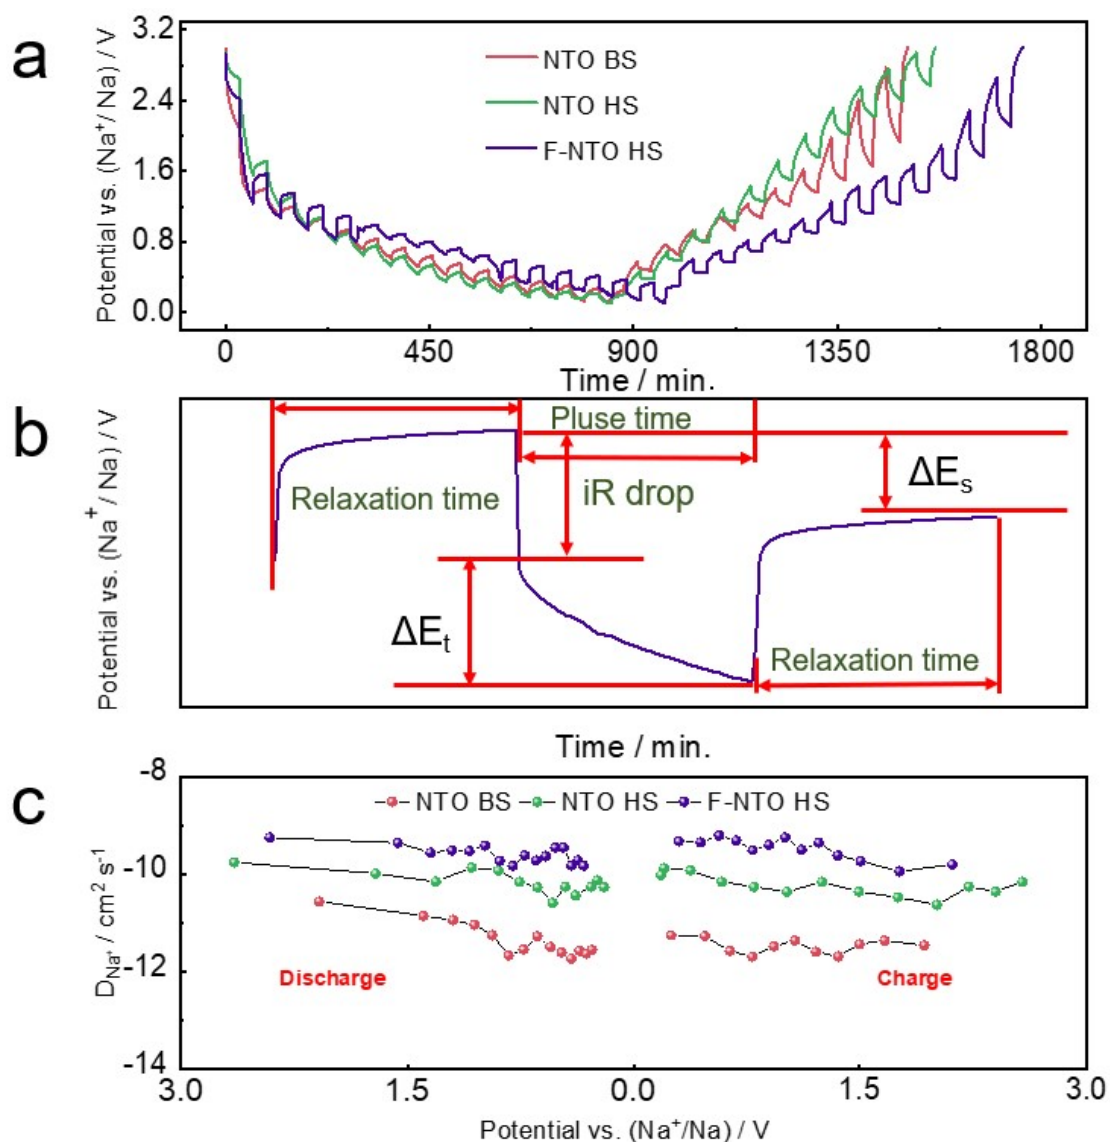

**Fig. S4.** Discharge-charge GITT curves after relaxation for 30 minutes at 0.1 A g<sup>-1</sup> of NTO, NTO HS and F-NTTO HS (a). *E* versus *t* profile of the F-NTTO HS electrode for a single GITT during discharge process, which is composed of 30 min. galvanostatic charge (pluse) at 0.1 A g<sup>-1</sup>, followed by 30 min. relaxation. The iR drop is shown along with the  $\Delta E_t$  and  $\Delta E_s$  (b). The corresponding Na<sup>+</sup> diffusion coefficient ( $D_{Na^+}$ ) (c).

The Na<sup>+</sup> diffusion coefficient can be obtained by the following equation:

$$D = \frac{4}{\pi\tau} \left( \frac{mV_m}{MA} \right)^2 \left( \frac{\Delta E_s}{\Delta E_t} \right)^2 \quad (1)$$

Where  $\tau$  is the relaxation time (s), *m* refers to the mass of active materials, *A* stands for

the geometric area of electrode.  $V_m$  and  $M$  mean the molar volume and molar mass of active materials, respectively.  $\Delta E_s$  corresponds to quasi-thermodynamic equilibrium voltage change before and after the current pulse.  $\Delta E_\tau$  means the potential change during the current pulse.

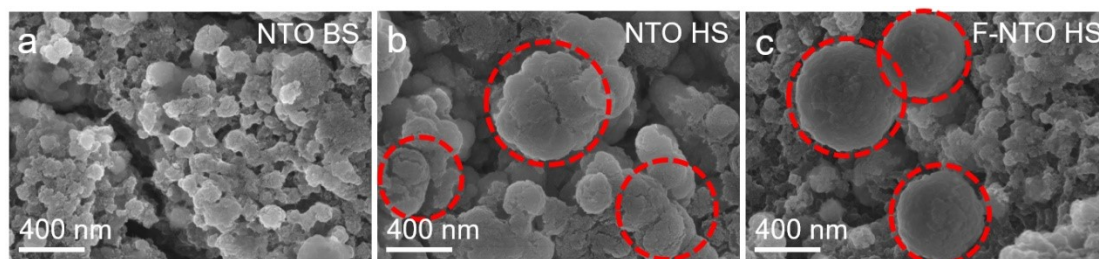

**Fig. S5.** SEM images of NTO HS (a), NTO HS (b) and F-NTO HS (c) anodes after 50 cycles.

Table S1. Electrochemical performances for the as-synthesized electrodes.

| Performance                 |              | F-NTO HS | NTO HS | NTO BS |
|-----------------------------|--------------|----------|--------|--------|
|                             | 1C           | 281.3    | 233.5  | 154    |
|                             | 2C           | 237.2    | 197.3  | 125.8  |
|                             | 5C           | 201.1    | 170.0  | 111.8  |
| Rate capability             | 10C          | 180.2    | 155.4  | 103.4  |
| / mAh g <sup>-1</sup>       | 20C          | 166.3    | 145.8  | 82.6   |
|                             | 30C          | 155.5    | 135.9  | 71.8   |
|                             | 40C          | 145.5    | 122.4  | 64.7   |
|                             | 50C          | 135.6    | 115.3  | 60.8   |
| Long-term cycling Stability | 1000 cycles  | 67.5     | 44.3   | 24.9   |
| / %                         | 11000 cycles | 87.29    | 47.13  | 0      |

Table S2. Electrochemical performance comparison of Na<sub>2</sub>Ti<sub>3</sub>O<sub>7</sub>-based materials.<sup>2-24</sup>

| material                  | Cycling capacity<br>(mAh g <sup>-1</sup> ) | Cycle number | current density<br>(mA g <sup>-1</sup> ) | Ref. |
|---------------------------|--------------------------------------------|--------------|------------------------------------------|------|
| 3D Microflowers NTO       | 100.1                                      | 1000         | 200                                      | 1    |
| Hollow NTO                | 99.7                                       | 2000         | 5000                                     | 2    |
| Red blood cell-like NTO@C | 75.5                                       | 1000         | 3540                                     | 3    |
| NTO@C                     | 62.5                                       | 200          | 500                                      | 4    |
| Layered NTO               | 131.4                                      | 1000         | 1000                                     | 5    |
| 3D NTO Nanosheet          | 135.5                                      | 1000         | 1000                                     | 6    |
| NTO nanofibre             | 162.4                                      | 1000         | 708                                      | 7    |
| NTO                       | 42                                         | 90           | 1600                                     | 8    |
| Layered NTO               | 181.5                                      | 100          | 600                                      | 9    |
| NTO@C                     | 187.2                                      | 100          | 177                                      | 10   |
| N-NTO@C                   | 88.9                                       | 1555         | 100                                      | 11   |
| NTO@rGO                   | 137.4                                      | 500          | 100                                      | 12   |
| NTO                       | 119.2                                      | 100          | 100                                      | 13   |

|                                                                                |              |              |             |          |
|--------------------------------------------------------------------------------|--------------|--------------|-------------|----------|
| NTO Nanotube                                                                   | 84.5         | 10000        | 1770        | 14       |
| NTO@C-BP                                                                       | 143.5        | 400          | 200         | 15       |
| NTO                                                                            | 140.0        | 500          | 885         | 16       |
| Double-Shell S-NTO                                                             | 105.0        | 12000        | 8850        | 17       |
| NTO nanotube/g-C <sub>3</sub> N <sub>4</sub> / graphene                        | 104.8        | 300          | 2000        | 18       |
| NTO nanotube                                                                   | 60.5         | 500          | 400         | 19       |
| Fe <sub>3</sub> O <sub>4</sub> @Na <sub>2</sub> Ti <sub>3</sub> O <sub>7</sub> | 172.4        | 1000         | 885         | 20       |
| NTO@N-Doped Carbon                                                             | 72.9         | 1000         | 8850        | 21       |
| 3D NTO                                                                         | 62.6         | 100          | 1000        | 22       |
| <b>This work</b>                                                               | <b>138.8</b> | <b>11000</b> | <b>8850</b> | <b>/</b> |

Table S3. Fitting Results of EIS Data for as-synthesized electrodes.

| Cycle number      | NTO HS         |                                        | F-NTO HS       |                                        |
|-------------------|----------------|----------------------------------------|----------------|----------------------------------------|
|                   | Rsf / $\Omega$ | $D_{Na^+} / \text{cm}^2 \text{s}^{-1}$ | Rsf / $\Omega$ | $D_{Na^+} / \text{cm}^2 \text{s}^{-1}$ |
| 1 <sup>st</sup>   | 50.4           | $0.78 \times 10^{-10}$                 | 42.3           | $1.88 \times 10^{-10}$                 |
| 25 <sup>th</sup>  | 132.5          | $0.40 \times 10^{-10}$                 | 73.8           | $1.76 \times 10^{-10}$                 |
| 50 <sup>th</sup>  | 190.2          | $0.19 \times 10^{-10}$                 | 108.4          | $1.82 \times 10^{-10}$                 |
| 75 <sup>th</sup>  | 290.4          | $0.11 \times 10^{-10}$                 | 145.6          | $1.95 \times 10^{-10}$                 |
| 100 <sup>th</sup> | 389.9          | $0.07 \times 10^{-10}$                 | 176.7          | $1.81 \times 10^{-10}$                 |

Table S4. Bader charge analysis of Ti.

| ion                        | NO. | NTO           |                                            |                        | NTO-F                        |                      |                        |
|----------------------------|-----|---------------|--------------------------------------------|------------------------|------------------------------|----------------------|------------------------|
|                            |     | Charge/e      | $d_{\min}/\text{nm}$                       | Volume/ $\text{\AA}^3$ | Charge/e <sup>-</sup>        | $d_{\min}/\text{nm}$ | Volume/ $\text{\AA}^3$ |
| Ti                         | 1   | 2.102393      | 0.800657                                   | 7.829199               | 2.190750                     | 0.905757             | 8.102746               |
|                            | 2   | 2.102393      | 0.800657                                   | 7.829199               | 2.190750                     | 0.905757             | 8.102746               |
|                            | 3   | 2.080788      | 0.842283                                   | 7.761505               | 2.187370                     | 0.838958             | 8.094408               |
|                            | 4   | 2.080788      | 0.842283                                   | 7.761505               | 2.187370                     | 0.838958             | 8.094408               |
|                            | 5   | 2.102394      | 0.800657                                   | 7.829199               | 2.120253                     | 0.807463             | 7.949695               |
|                            | 6   | 2.102394      | 0.800657                                   | 7.829199               | 2.120253                     | 0.807463             | 7.949695               |
|                            | 7   | 2.091610      | 0.816787                                   | 7.932239               | 2.099675                     | 0.807544             | 8.039024               |
|                            | 8   | 2.091610      | 0.816787                                   | 7.932239               | 2.099675                     | 0.807544             | 8.039024               |
|                            | 9   | 2.091610      | 0.816787                                   | 7.932239               | 2.104626                     | 0.811921             | 7.950886               |
|                            | 10  | 2.091610      | 0.816787                                   | 7.932239               | 2.104626                     | 0.811921             | 7.950886               |
|                            | 11  | 2.080788      | 0.842283                                   | 7.761505               | 2.085374                     | 0.85661              | 7.765677               |
|                            | 12  | 2.080788      | 0.842283                                   | 7.761505               | 2.085374                     | 0.85661              | 7.765677               |
| <b>TiO<sub>2</sub>: +4</b> |     | <b>~2.054</b> | <b>NaTi<sub>2</sub>O<sub>4</sub>: +3.5</b> | <b>~2.179</b>          | <b>NaTiO<sub>2</sub>: +3</b> | <b>~2.340</b>        |                        |

Table S5. Experimental and calculated diffusion coefficients for NTO and NTO-F



| Direction | Path | Sample | Energy barrier/eV | Diffusion coefficient /cm <sup>2</sup> s <sup>-1</sup> | Sample                 | Energy barrier/eV | Diffusion coefficient /cm <sup>2</sup> s <sup>-1</sup> |                        |
|-----------|------|--------|-------------------|--------------------------------------------------------|------------------------|-------------------|--------------------------------------------------------|------------------------|
| Exp.      | -    | -      | NTO               | -                                                      | 1.09 $\times 10^{-1}$  | NTO-F             | -                                                      | 4.27 $\times 10^{-10}$ |
|           |      | Path 1 | 0.24              | 1.56 $\times 10^{-7}$                                  |                        | 0.32              | 7.22 $\times 10^{-9}$                                  |                        |
|           | b    | Path 2 | -                 | -                                                      |                        | 0.33              | 4.91 $\times 10^{-9}$                                  |                        |
|           |      | Path 3 | 0.20              | 7.30 $\times 10^{-7}$                                  |                        | 0.25              | 1.07 $\times 10^{-7}$                                  |                        |
|           |      | Path 4 | -                 | -                                                      |                        | 0.28              | 3.37 $\times 10^{-8}$                                  |                        |
| Cal.      | a    | Path 1 | NTO               | 2.4                                                    | 1.30 $\times 10^{-35}$ | NTO-F             | 2.8                                                    | 2.72 $\times 10^{-42}$ |
|           |      | Path 1 |                   | 0.49                                                   | 1.04 $\times 10^{-11}$ |                   | 0.41                                                   | 2.27 $\times 10^{-10}$ |
|           | c    | Path 2 |                   | 0.31                                                   | 1.07 $\times 10^{-8}$  |                   | 0.41                                                   | 2.27 $\times 10^{-10}$ |
|           |      | Path 3 | NTO               | 0.26                                                   | 7.26 $\times 10^{-8}$  | NTO-F             | 0.24                                                   | 1.57 $\times 10^{-7}$  |
|           |      | Path 4 |                   | 0.17                                                   | 2.31 $\times 10^{-6}$  |                   | 0.22                                                   | 3.39 $\times 10^{-7}$  |

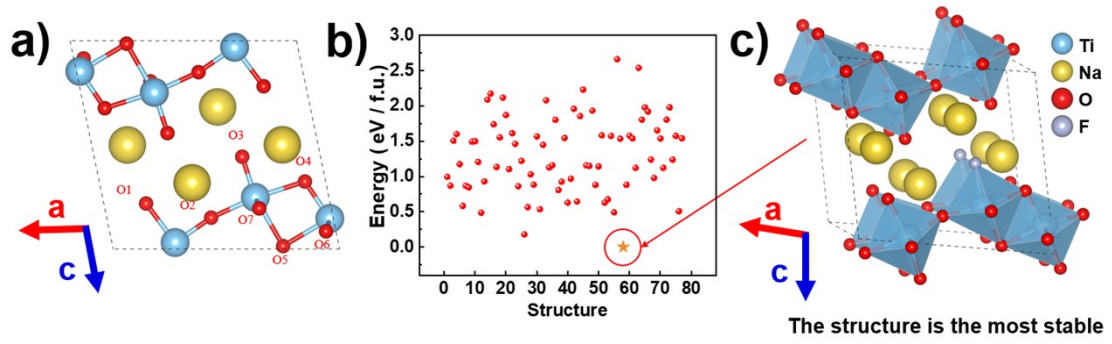

**Fig. S6.** Different sites of O in NTO-F (a). Energy of different configurations (b) and crystal structure of the most stable configuration for the NTO-F (c).

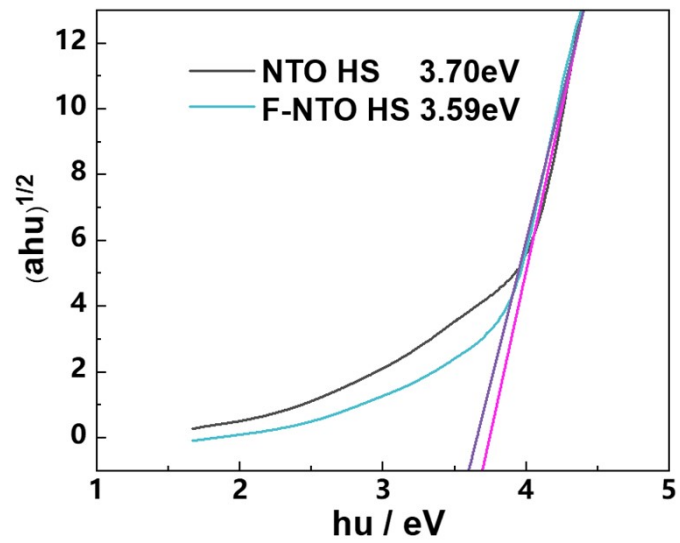

**Fig. S7.** Tauc plot of the NTO HS and F-NTO HS.

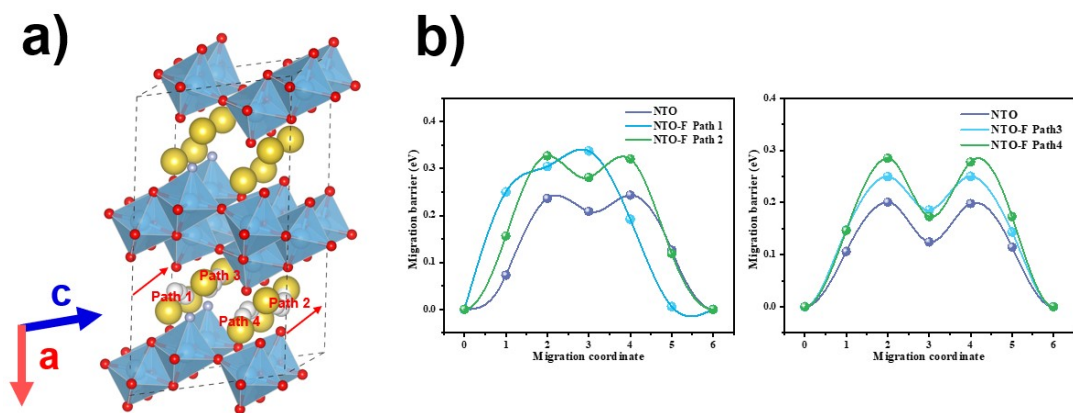

**Fig. S8.** The b-axis direction of NTO-F (a). Energy barriers of Na<sup>+</sup> for different diffusion paths (b).

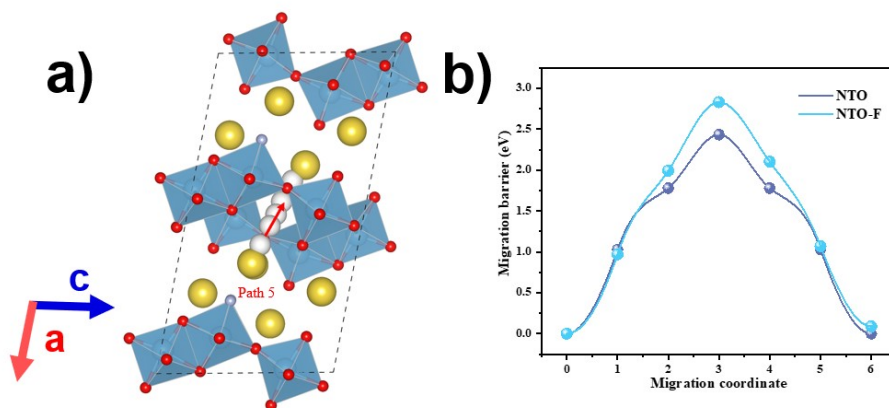

**Fig. S9.** The a-axis direction of NTO-F (a). Energy barriers of Na<sup>+</sup> for diffusion paths (b).

## References

- 1 C.J. Wen, R.A. Huggins, *Mater. Res. Bull.*, 1980, **15**, 1225.
- 2 W. Weppner, *J. Electrochem. Soc.*, 1977, **124**, 1569.
- 3 S. Anwer, Y. Huang, J. Liu, J. Liu, M. Xu, Z. Wang, R. Chen, J. Zhang and F. Wu, *ACS Appl. Mater. Interfaces*, 2017, **9**, 11669-11677.
- 4 H. Chen, Y. Wu, J. Duan, R. Zhan, W. Wang, M.Q. Wang, Y. Chen, M. Xu and S.J. Bao, *ACS Appl. Mater. Interfaces*, 2019, **11**, 42197-42205.
- 5 S. Chen, Y. Pang, J. Liang and S. Ding, *J. Mater. Chem. A*, 2018, **6**, 13164-13170.
- 6 C. Ding, T. Nohira and R. Hagiwara, *J. Power Sources*, 2017, **354**, 10-15.
- 7 S. Dong, Z. Li, I.A. Rodríguez-Pérez, H. Jiang, J. Lu, X. Zhang and X. Ji, *Nano Energy*, 2017, **40**, 233-239.
- 8 S. Dong, L. Shen, H. Li, G. Pang, H. Dou and X. Zhang, *Adv. Funct. Mater.*, 2016, **26**, 3703-3710.
- 9 D. Kong, Y. Wang, S. Huang, Y.V. Lim, J. Zhang, L. Sun, B. Liu, T. Chen, P. Valdivia y Alvarado and H.Y. Yang, *J. Mater. Chem. A*, 2019, **7**, 12751-12762.
- 10 T.L. Kulova, Y.O. Kudryashova, A.A. Kuz'mina, A.M. Skundin, I.A. Stenina, A.A. Chekannikov, A.B. Yaroslavtsev and J. Libich, *J Solid State Electrochem.*, 2018, **23**, 455-463.
- 11 H. Li, L. Peng, Y. Zhu, D. Chen, X. Zhang and G. Yu, *Energy Environ. Sci.*, 2016, **9**, 3399-3405.
- 12 M. Li, X. Xiao, X. Fan, X. Huang, Y. Liu and L. Chen, *J. Alloys Compd.*, 2017, **712**, 365-372.
- 13 P. Li, W. Wang, S. Gong, F. Lv, H. Huang, M. Luo, Y. Yang, C. Yang, J. Zhou, C. Qian, B. Wang, Q. Wang and S. Guo, *ACS Appl. Mater. Interfaces*, 2018, **10**, 37974-37980.
- 14 Z. Li, Y. Huang, Y. Jiang, Z. Wang, B. Lu, J. Zhou and M. Xie, *ChemElectroChem*, 2020, **7**, 2258-2264.
- 15 A. Mukherjee, S. Mondal, D. Das, S. Banerjee and S.B. Majumder, *Mater. Lett.*, 2021, **301**, 130219.
- 16 J. Ni, S. Fu, C. Wu, Y. Zhao, J. Maier, Y. Yu and L. Li, *Adv. Energy Mater.*, 2016,

6, 1502568.

17 T. Song, H. Chen, Q. Xu, H. Liu, Y.G. Wang and Y. Xia, *ACS Appl. Mater. Interfaces*, 2018, **10**, 37163-37171.

18 D. Sriramulu and H.Y. Yang, *Nanoscale*, 2019, **11**, 5896-5908.

19 N. Wang, X. Xu, T. Liao, Y. Du, Z. Bai and S. Dou, *Adv. Mater.*, 2018, **30**, 1804157.

20 S. Wang, Y. Zhu, M. Jiang, J. Cui, Y. Zhang and W. He, *Int. J. Hydrog. Energy*, 2020, **45**, 19611-19619.

21 Y. Wu, J. Wu, S. Zhang, L. Zhu, Z. Yan and X. Cao, *J Solid State Chem*, 2021, **300**, 122247.

22 X. Wang, Y. Li, Y. Gao, Z. Wang and L. Chen, *Nano Energy*, 2015, **13**, 687-692.

23 F. Xie, L. Zhang, D. Su, M. Jaroniec and S.Z. Qiao, *Adv. Mater.*, 2017, **29**, 1700989.

24 Q. Zhang, T. Zhang, Y. Wei, T. Zhai and H. Li, *J. Mater. Chem. A*, 2017, **5**, 18691-18697.
